# Supplementary material for: Predicting Forearm Physical Exposures During Computer Work Using Self-Reports, Software-Recorded Computer Usage Patterns, and Anthropometric and Workstation Measurements
Source: Oxford University Press journal article supplement (doi:10.1093/annweh/wxx092), 2017-10-31
Supplement: wxx092_suppl_supplementary_material.pdf [file wxx092_suppl_supplementary_material.pdf]

## Online Supplementary Material

---

### **Predicting forearm physical exposures during computer work using self-reports, software-recorded computer usage patterns, and anthropometric and workstation measurements**

M.A. Huysmans<sup>a,b</sup>, B.H.W. Eijkelhof<sup>a,b</sup>, J.L. Bruno Garza<sup>c</sup>, P. Coenen<sup>a,d</sup>, B.M. Blatter<sup>b,e</sup>, P.W. Johnson<sup>f</sup>, J.H. van Dieën<sup>b,g</sup>, A.J. van der Beek<sup>a,b</sup>, J.T. Dennerlein<sup>a,c,h</sup>

a) Department of Public and Occupational Health and Amsterdam Public Health research institute, VU University Medical Center, Amsterdam, The Netherlands

(b) Body@Work Research Center on Physical Activity, Work and Health, TNO-VU/VUmc, Amsterdam, The Netherlands

(c) Department of Environmental Health, Harvard University, Boston, U.S.A.

(d) School of Physiotherapy and Exercise Science, Curtin University, Perth, Australia.

(e) Netherlands Organisation for Applied Scientific Research, TNO, Hoofddorp, The Netherlands

(f) Department of Environmental and Occupational Health Sciences, University of Washington, Seattle, U.S.A.

(g) MOVE Research Institute Amsterdam, Faculty of Human Movement Sciences, VU University Amsterdam, Amsterdam, The Netherlands

(h) Department of Physical Therapy, Movement, and Rehabilitation Sciences, Bouvé College of Health Sciences, Northeastern University, 360 Huntington Avenue, Boston, USA.

#### Authors' email addresses:

Maaïke A Huysmans: [m.huysmans@vumc.nl](mailto:m.huysmans@vumc.nl)

Belinda HW Eijkelhof: [eijkelhof.l@hsleiden.nl](mailto:eijkelhof.l@hsleiden.nl)

Jennifer L Bruno Garza: [garza@uchc.edu](mailto:garza@uchc.edu)

Pieter Coenen: [p.coenen@vumc.nl](mailto:p.coenen@vumc.nl)

Birgitte M Blatter: [b.blatter@veiligheid.nl](mailto:b.blatter@veiligheid.nl)

Peter W Johnson: [petej@u.washington.edu](mailto:petej@u.washington.edu)

Jaap H van Dieën: [j.van.dieen@vu.nl](mailto:j.van.dieen@vu.nl)

Allard J van der Beek: [a.vanderbeek@vumc.nl](mailto:a.vanderbeek@vumc.nl)

Jack T Dennerlein: [j.dennerlein@neu.edu](mailto:j.dennerlein@neu.edu)

#### Corresponding Author:

Dr. M.A. Huysmans

VU University Medical Center - Department of Public and Occupational Health

PO Box 7057

1007 MB Amsterdam

The Netherlands

E mail: [m.huysmans@vumc.nl](mailto:m.huysmans@vumc.nl)

Tel: +31 20 444 8172

Fax: +31 20 444 8387

**Part 1**.....page 3

**Part 2**.....page 10

**Part 3**.....page 15

## Part 1

Results of each of the final models (beta, standard error and p-values) from the full data set, as well as from the bootstrapping procedure.

### Wrist muscle activity (%MVC) - left ECR

| Variable nr.          | Not bootstrapped |       |       | Bootstrapped |       |       |
|-----------------------|------------------|-------|-------|--------------|-------|-------|
|                       | B                | SE    | p-val | B            | SE    | p-val |
| 16                    | -.121            | .060  | .046  | -.121        | .051  | .015  |
| 7                     | .080             | .039  | .044  | .080         | .036  | .030  |
| 28                    | -.880            | .376  | .021  | -.880        | .330  | .009  |
| 38                    | -.999            | .505  | .051  | -.999        | .492  | .040  |
| 41                    | -.540            | .187  | .005  | -.540        | .194  | .006  |
| 46                    | 7.291            | 1.614 | .000  | 7.291        | 1.734 | .001  |
| 58                    | .500             | .288  | .086  | .500         | .297  | .091  |
| 63                    | .667             | .313  | .036  | .667         | .376  | .072  |
| 65                    | .595             | .209  | .005  | .595         | .240  | .015  |
| 75                    | -1.109           | .552  | .047  | -1.109       | .554  | .037  |
| R <sup>2</sup> =0.415 |                  |       |       |              |       |       |
| RMS=1.765             |                  |       |       |              |       |       |

### Wrist muscle activity (%MVC) - right ECR

| Variable nr.          | Not bootstrapped |      |       | Bootstrapped |      |       |
|-----------------------|------------------|------|-------|--------------|------|-------|
|                       | B                | SE   | p-val | B            | SE   | p-val |
| 16                    | -.183            | .084 | .032  | -.183        | .085 | .039  |
| 1                     | -.073            | .022 | .001  | -.073        | .023 | .002  |
| 20                    | -.093            | .030 | .003  | -.093        | .029 | .004  |
| 25                    | 1.060            | .402 | .010  | 1.060        | .350 | .003  |
| 39                    | -1.326           | .774 | .090  | -1.326       | .797 | .092  |
| 45                    | .454             | .162 | .006  | .454         | .174 | .016  |
| 52                    | .150             | .072 | .039  | .150         | .074 | .049  |
| 76                    | -.696            | .238 | .004  | -.696        | .251 | .011  |
| 103                   | -1.085           | .536 | .045  | -1.085       | .497 | .030  |
| R <sup>2</sup> =0.350 |                  |      |       |              |      |       |
| RMS=2.447             |                  |      |       |              |      |       |

Wrist Posture (degrees) - left flexion-extension

| Variable nr.                        | Not bootstrapped |       |       | Bootstrapped |       |       |
|-------------------------------------|------------------|-------|-------|--------------|-------|-------|
|                                     | B                | SE    | p-val | B            | SE    | p-val |
| 6                                   | 1.831            | .780  | .021  | 1.831        | .837  | .029  |
| 7                                   | .524             | .225  | .022  | .524         | .213  | .007  |
| 42                                  | 3.718            | 1.455 | .012  | 3.718        | 1.479 | .017  |
| 75                                  | -6.413           | 3.240 | .050  | -6.413       | 2.183 | .006  |
| R <sup>2</sup> =0.162<br>RMS=10.560 |                  |       |       |              |       |       |

Wrist Posture (degrees) - left radial-ulnar deviation

| Variable nr.                       | Not bootstrapped |       |       | Bootstrapped |       |       |
|------------------------------------|------------------|-------|-------|--------------|-------|-------|
|                                    | B                | SE    | p-val | B            | SE    | p-val |
| 8                                  | -.565            | .225  | .014  | -.565        | .242  | .035  |
| 18                                 | 3.953            | 1.551 | .012  | 3.953        | 1.676 | .029  |
| 19                                 | 2.971            | 1.187 | .014  | 2.971        | 1.102 | .010  |
| 22                                 | 6.071            | 2.502 | .017  | 6.071        | 2.107 | .005  |
| 25                                 | -2.172           | 1.264 | .089  | -2.172       | 1.877 | .261  |
| 36                                 | -3.817           | 1.577 | .017  | -3.817       | 1.356 | .009  |
| 46                                 | 27.213           | 6.985 | .000  | 27.213       | 6.845 | .001  |
| 88                                 | -.136            | .069  | .051  | -.136        | .068  | .050  |
| 76                                 | 1.642            | .726  | .026  | 1.642        | .854  | .077  |
| R <sup>2</sup> =0.341<br>RMS=7.740 |                  |       |       |              |       |       |

Wrist Posture (degrees) - right flexion-extension

| Variable nr.                        | Not bootstrapped |        |       | Bootstrapped |        |       |
|-------------------------------------|------------------|--------|-------|--------------|--------|-------|
|                                     | B                | SE     | p-val | B            | SE     | p-val |
| 42                                  | 3.880            | 1.442  | .008  | 3.880        | 1.711  | .029  |
| 48                                  | -23.387          | 12.089 | .056  | -23.387      | 13.124 | .082  |
| 87                                  | -.326            | .147   | .029  | -.326        | .188   | .088  |
| 91                                  | -.359            | .206   | .083  | -.359        | .199   | .068  |
| 74                                  | 4.001            | 2.054  | .054  | 4.001        | 2.022  | .058  |
| 75                                  | -7.101           | 3.406  | .039  | -7.101       | 3.204  | .027  |
| 104                                 | 2.686            | 1.134  | .020  | 2.686        | 1.068  | .022  |
| R <sup>2</sup> =0.228<br>RMS=10.551 |                  |        |       |              |        |       |

Wrist Posture (degrees) - right radial-ulnar deviation

| Variable nr.                       | Not bootstrapped |       |       | Bootstrapped |       |       |
|------------------------------------|------------------|-------|-------|--------------|-------|-------|
|                                    | B                | SE    | p-val | B            | SE    | p-val |
| 1                                  | .202             | .059  | .001  | .202         | .079  | .010  |
| 42                                 | -2.092           | .987  | .036  | -2.092       | 1.182 | .082  |
| 47                                 | -10.567          | 5.815 | .072  | -10.567      | 6.502 | .115  |
| 56                                 | .036             | .023  | .117  | .036         | .018  | .058  |
| 81                                 | -.152            | .068  | .027  | -.152        | .060  | .009  |
| R <sup>2</sup> =0.185<br>RMS=6.890 |                  |       |       |              |       |       |

Wrist velocity (degrees/s) - left flexion-extension

| Variable name         | Variable nr. | Not bootstrapped |       |       | Bootstrapped |       |       |
|-----------------------|--------------|------------------|-------|-------|--------------|-------|-------|
|                       |              | B                | SE    | p-val | B            | SE    | p-val |
| MHandBreadth          | 15           | .306             | .165  | .067  | .306         | .484  | .029  |
| cntrct                | 18           | -2.547           | 1.004 | .013  | -2.547       | .918  | .005  |
| muist                 | 33           | -.522            | .237  | .030  | -.522        | .251  | .045  |
| belas                 | 63           | 2.201            | .865  | .012  | 2.201        | .665  | .001  |
| ander                 | 103          | -3.119           | 1.073 | .004  | -3.119       | 1.028 | .005  |
| R <sup>2</sup> =0.238 |              |                  |       |       |              |       |       |
| RMS=5.120             |              |                  |       |       |              |       |       |

Wrist velocity (degrees/s) - left radial-ulnar deviation

| Variable nr.          | Not bootstrapped |       |       | Bootstrapped |       |       |
|-----------------------|------------------|-------|-------|--------------|-------|-------|
|                       | B                | SE    | p-val | B            | SE    | p-val |
| 13                    | -.395            | .132  | .003  | -.395        | .139  | .010  |
| 6                     | .413             | .218  | .060  | .413         | .253  | .117  |
| 20                    | -.059            | .035  | .097  | -.059        | .035  | .093  |
| 78                    | -2.664           | 1.175 | .025  | -2.664       | 1.319 | .049  |
| 88                    | -.074            | .025  | .005  | -.074        | .021  | .001  |
| 90                    | -.080            | .034  | .022  | -.080        | .043  | .025  |
| R <sup>2</sup> =0.264 |                  |       |       |              |       |       |
| RMS=2.846             |                  |       |       |              |       |       |

Wrist velocity (degrees/s) - right flexion-extension

| Variable nr.          | Not bootstrapped |       |       | Bootstrapped |       |       |
|-----------------------|------------------|-------|-------|--------------|-------|-------|
|                       | B                | SE    | p-val | B            | SE    | p-val |
| 15                    | 1.054            | .227  | .000  | 1.054        | .820  | .001  |
| 24                    | -5.420           | 2.552 | .036  | -5.420       | 2.933 | .060  |
| 26                    | 2.420            | .974  | .015  | 2.420        | 1.379 | .084  |
| 41                    | -1.646           | .690  | .019  | -1.646       | .699  | .027  |
| 46                    | 11.073           | 6.296 | .082  | 11.073       | 5.833 | .055  |
| 81                    | -.149            | .069  | .033  | -.149        | .080  | .070  |
| 100                   | -.940            | .385  | .016  | -.940        | .385  | .023  |
| 103                   | -3.923           | 1.450 | .008  | -3.923       | 1.331 | .003  |
| R <sup>2</sup> =0.378 |                  |       |       |              |       |       |
| RMS=6.776             |                  |       |       |              |       |       |

Wrist velocity (degrees/s) - right radial-ulnar deviation

| Variable nr.          | Not bootstrapped |       |       | Bootstrapped |       |       |
|-----------------------|------------------|-------|-------|--------------|-------|-------|
|                       | B                | SE    | p-val | B            | SE    | p-val |
| 12                    | .296             | .075  | .000  | .296         | .109  | .006  |
| 13                    | -1.041           | .186  | .000  | -1.041       | .281  | .001  |
| 14                    | .057             | .022  | .010  | .057         | .295  | .011  |
| 15                    | -.209            | .119  | .083  | -.209        | .390  | .061  |
| 20                    | -.083            | .040  | .040  | -.083        | .042  | .043  |
| 27                    | 1.645            | .516  | .002  | 1.645        | .596  | .008  |
| 43                    | -1.726           | .971  | .079  | -1.726       | 1.086 | .097  |
| 47                    | -10.218          | 3.242 | .002  | -10.218      | 3.354 | .005  |
| 48                    | -10.691          | 4.375 | .016  | -10.691      | 4.923 | .039  |
| 57                    | .587             | .294  | .048  | .587         | .285  | .049  |
| 65                    | .840             | .346  | .017  | .840         | .344  | .024  |
| 87                    | .086             | .045  | .059  | .086         | .048  | .079  |
| 91                    | .117             | .064  | .070  | .117         | .061  | .061  |
| 103                   | -1.784           | .685  | .011  | -1.784       | .724  | .028  |
| R <sup>2</sup> =0.556 |                  |       |       |              |       |       |
| RMS=3.189             |                  |       |       |              |       |       |

Wrist acceleration (degrees/s<sup>2</sup>) - left flexion-extension

| Variable nr.          | Not bootstrapped |        |       | Bootstrapped |        |            |
|-----------------------|------------------|--------|-------|--------------|--------|------------|
|                       | B                | SE     | p-val | B            | SE     | p-val      |
| 13                    | -11.739          | 3.820  | .003  | -11.739      | 4.133  | .006       |
| 2                     | -48.652          | 17.498 | .006  | -48.652      | 17.051 | .007       |
| 18                    | -40.524          | 14.184 | .005  | -40.524      | 13.369 | .005       |
| 19                    | -18.997          | 10.900 | .084  | -18.997      | 13.005 | .158       |
| 33                    | -5.570           | 3.563  | .121  | -5.570       | 3.196  | .088       |
| 38                    | -26.343          | 20.050 | .192  | -26.343      | 27.517 | .335       |
| 54                    | 12.320           | 4.196  | .004  | 12.320       | 4.056  | .008       |
| 63                    | 38.967           | 12.349 | .002  | 38.967       | 7.597  | .001       |
| 103                   | -41.476          | 15.234 | .008  | -41.476      | 13.760 | .004       |
| R <sup>2</sup> =0.383 |                  |        |       |              |        | RMS=71.112 |

Wrist acceleration (degrees/s<sup>2</sup>) - left radial-ulnar deviation

| Variable nr.          | Not bootstrapped |        |       | Bootstrapped |        |            |
|-----------------------|------------------|--------|-------|--------------|--------|------------|
|                       | B                | SE     | p-val | B            | SE     | p-val      |
| 13                    | -5.501           | 1.627  | .001  | -5.501       | 1.746  | .001       |
| 28                    | -15.258          | 7.562  | .046  | -15.258      | 8.014  | .075       |
| 46                    | 88.517           | 32.262 | .007  | 88.517       | 32.859 | .011       |
| 53                    | -.879            | .515   | .091  | -.879        | .529   | .099       |
| 54                    | 4.887            | 2.130  | .024  | 4.887        | 1.978  | .016       |
| 78                    | -26.229          | 15.359 | .091  | -26.229      | 18.289 | .159       |
| 86                    | .088             | .051   | .089  | .088         | .996   | .106       |
| 88                    | -.965            | .316   | .003  | -.965        | .267   | .002       |
| 90                    | -1.142           | .433   | .010  | -1.142       | .481   | .004       |
| R <sup>2</sup> =0.379 |                  |        |       |              |        | RMS=35.139 |

Wrist acceleration (degrees/s<sup>2</sup>) - light flexion-extension

| Variable nr.          | Not bootstrapped |        |       | Bootstrapped |        |                   |
|-----------------------|------------------|--------|-------|--------------|--------|-------------------|
|                       | B                | SE     | p-val | B            | SE     | p-val             |
| 13                    | -19.560          | 5.786  | .001  | -19.560      | 5.988  | .004 <sup>b</sup> |
| 15                    | 7.994            | 3.854  | .041  | 7.994        | 14.733 | .039 <sup>b</sup> |
| 2                     | -61.447          | 26.701 | .023  | -61.447      | 27.899 | .031 <sup>b</sup> |
| 18                    | -40.262          | 20.928 | .057  | -40.262      | 21.540 | .067 <sup>b</sup> |
| 24                    | -94.271          | 37.881 | .014  | -94.271      | 41.121 | .022 <sup>b</sup> |
| 26                    | 32.589           | 14.496 | .027  | 32.589       | 22.292 | .146 <sup>b</sup> |
| 41                    | -29.650          | 10.892 | .008  | -29.650      | 11.191 | .019 <sup>b</sup> |
| 46                    | 183.978          | 96.681 | .060  | 183.978      | 96.264 | .068 <sup>b</sup> |
| 54                    | 15.143           | 5.751  | .010  | 15.143       | 6.455  | .022 <sup>b</sup> |
| 80                    | 7.109            | 3.403  | .039  | 7.109        | 3.610  | .060 <sup>b</sup> |
| 100                   | -14.993          | 6.294  | .019  | -14.993      | 6.004  | .016 <sup>b</sup> |
| 101                   | 39.304           | 23.741 | .101  | 39.304       | 25.204 | .119 <sup>b</sup> |
| 103                   | -60.471          | 21.385 | .006  | -60.471      | 19.168 | .002 <sup>b</sup> |
| R <sup>2</sup> =0.516 |                  |        |       |              |        | RMS=99.952        |

Wrist acceleration (degrees/s<sup>2</sup>) - right radial-ulnar deviation

| Variable nr.          | Not bootstrapped |        |       | Bootstrapped |        |       |
|-----------------------|------------------|--------|-------|--------------|--------|-------|
|                       | B                | SE     | p-val | B            | SE     | p-val |
| 12                    | 2.835            | .923   | .003  | 2.835        | 1.487  | .062  |
| 19                    | 21.494           | 7.878  | .007  | 21.494       | 7.843  | .011  |
| 47                    | -266.551         | 50.539 | .000  | -266.551     | 56.598 | .001  |
| 48                    | -319.535         | 66.184 | .000  | -319.535     | 68.665 | .001  |
| 57                    | 9.606            | 4.817  | .049  | 9.606        | 5.137  | .068  |
| 65                    | 14.297           | 5.789  | .015  | 14.297       | 6.379  | .039  |
| R <sup>2</sup> =0.387 |                  |        |       |              |        |       |
| RMS=54.482            |                  |        |       |              |        |       |



Force (%MVF) - keyboard

| Variable nr.          | Not bootstrapped |      |       | Bootstrapped |      |       |
|-----------------------|------------------|------|-------|--------------|------|-------|
|                       | B                | SE   | p-val | B            | SE   | p-val |
| 10                    | -.010            | .004 | .010  | -.010        | .004 | .029  |
| 14                    | .076             | .004 | .000  | .076         | .045 | .001  |
| 67                    | -.234            | .090 | .010  | -.234        | .082 | .016  |
| 103                   | -.245            | .118 | .041  | -.245        | .089 | .014  |
| R <sup>2</sup> =0.796 |                  |      |       |              |      |       |
| RMS=0.565             |                  |      |       |              |      |       |

Force (%MVF) - mouse

| Variable nr.          | Not bootstrapped |      |       | Bootstrapped |      |       |
|-----------------------|------------------|------|-------|--------------|------|-------|
|                       | B                | SE   | p-val | B            | SE   | p-val |
| 10                    | -.011            | .003 | .000  | -.011        | .004 | .009  |
| 35                    | -.158            | .090 | .083  | -.158        | .077 | .056  |
| 46                    | -1.832           | .392 | .000  | -1.832       | .434 | .001  |
| 49                    | -.015            | .007 | .023  | -.015        | .008 | .048  |
| 57                    | .120             | .040 | .003  | .120         | .044 | .020  |
| 64                    | -.173            | .079 | .031  | -.173        | .087 | .061  |
| 79                    | .069             | .014 | .000  | .069         | .030 | .018  |
| 84                    | -.045            | .014 | .001  | -.045        | .015 | .007  |
| 104                   | .134             | .047 | .006  | .134         | .051 | .014  |
| R <sup>2</sup> =0.477 |                  |      |       |              |      |       |
| RMS=0.437             |                  |      |       |              |      |       |

## Part 2

Results of each of the final practical models (beta, standard error and p-values) and results from the bootstrapping procedure.

### Wrist muscle activity (%MVC) - left ECR

| Variable nr           | Not bootstrapped |       |       | Bootstrapped |       |       |
|-----------------------|------------------|-------|-------|--------------|-------|-------|
|                       | B                | SE    | p-val | B            | SE    | p-val |
| 2                     | .793             | .387  | .043  | .793         | .379  | .043  |
| 7                     | .082             | .038  | .035  | .082         | .036  | .029  |
| 28                    | -.879            | .375  | .021  | -.879        | .341  | .014  |
| 38                    | -.965            | .499  | .056  | -.965        | .488  | .046  |
| 41                    | -.557            | .184  | .003  | -.557        | .200  | .011  |
| 46                    | 7.145            | 1.617 | .000  | 7.145        | 1.843 | .001  |
| 58                    | .480             | .285  | .095  | .480         | .290  | .110  |
| 63                    | .640             | .311  | .042  | .640         | .375  | .081  |
| 65                    | .605             | .207  | .004  | .605         | .233  | .019  |
| 75                    | -1.186           | .553  | .034  | -1.186       | .565  | .033  |
| 103                   | -.664            | .372  | .077  | -.664        | .363  | .071  |
| R <sup>2</sup> =0.435 |                  |       |       |              |       |       |
| RMS=1.742             |                  |       |       |              |       |       |

### Wrist muscle activity (%MVC) - right ECR

| Variable nr           | Not bootstrapped |      |       | Bootstrapped |      |       |
|-----------------------|------------------|------|-------|--------------|------|-------|
|                       | B                | SE   | p-val | B            | SE   | p-val |
| 1                     | -.070            | .022 | .002  | -.070        | .024 | .002  |
| 20                    | -.090            | .031 | .004  | -.090        | .028 | .001  |
| 25                    | .994             | .409 | .017  | .994         | .369 | .012  |
| 45                    | .454             | .165 | .007  | .454         | .179 | .018  |
| 52                    | .146             | .073 | .049  | .146         | .072 | .047  |
| 71                    | 1.001            | .564 | .079  | 1.001        | .528 | .058  |
| 76                    | -.620            | .239 | .011  | -.620        | .248 | .021  |
| 103                   | -1.196           | .539 | .029  | -1.196       | .518 | .029  |
| R <sup>2</sup> =0.361 |                  |      |       |              |      |       |
| RMS=2.514             |                  |      |       |              |      |       |

Wrist Posture (degrees) - left flexion-extension

| Variable nr                         | Not bootstrapped |       |       | Bootstrapped |       |       |
|-------------------------------------|------------------|-------|-------|--------------|-------|-------|
|                                     | B                | SE    | p-val | B            | SE    | p-val |
| 6                                   | 1.831            | .780  | .021  | 1.831        | .837  | .029  |
| 7                                   | .524             | .225  | .022  | .524         | .213  | .007  |
| 42                                  | 3.718            | 1.455 | .012  | 3.718        | 1.479 | .017  |
| 75                                  | -6.413           | 3.240 | .050  | -6.413       | 2.183 | .006  |
| R <sup>2</sup> =0.162<br>RMS=10.560 |                  |       |       |              |       |       |

Wrist Posture (degrees) - left radial-ulnar deviation

| Variable nr                        | Not bootstrapped |       |       | Bootstrapped |       |       |
|------------------------------------|------------------|-------|-------|--------------|-------|-------|
|                                    | B                | SE    | p-val | B            | SE    | p-val |
| 76                                 | 2.094            | .738  | .005  | 2.094        | .902  | .038  |
| 19                                 | 3.825            | 1.189 | .002  | 3.825        | 1.039 | .001  |
| 22                                 | 4.495            | 2.506 | .076  | 4.495        | 2.173 | .044  |
| 25                                 | -3.586           | 1.368 | .010  | -3.586       | 2.452 | .154  |
| 36                                 | -4.129           | 1.587 | .011  | -4.129       | 1.471 | .008  |
| 46                                 | 23.324           | 7.015 | .001  | 23.324       | 6.554 | .003  |
| 57                                 | -1.970           | .744  | .009  | -1.970       | .995  | .057  |
| R <sup>2</sup> =0.297<br>RMS=7.918 |                  |       |       |              |       |       |

Wrist Posture (degrees) - right flexion-extension

| Variable nr                         | Not bootstrapped |        |       | Bootstrapped |        |       |
|-------------------------------------|------------------|--------|-------|--------------|--------|-------|
|                                     | B                | SE     | p-val | B            | SE     | p-val |
| 42                                  | 4.026            | 1.478  | .007  | 4.026        | 1.787  | .034  |
| 48                                  | -24.939          | 12.211 | .043  | -24.939      | 12.377 | .038  |
| 74                                  | 3.827            | 2.093  | .070  | 3.827        | 1.951  | .049  |
| 75                                  | -6.750           | 3.351  | .046  | -6.750       | 2.654  | .017  |
| 104                                 | 2.566            | 1.162  | .029  | 2.566        | 1.041  | .017  |
| R <sup>2</sup> =0.173<br>RMS=10.820 |                  |        |       |              |        |       |

Wrist Posture (degrees) - right radial-ulnar deviation

| Variable nr                        | Not bootstrapped |       |       | Bootstrapped |       |       |
|------------------------------------|------------------|-------|-------|--------------|-------|-------|
|                                    | B                | SE    | p-val | B            | SE    | p-val |
| 1                                  | .177             | .061  | .004  | .177         | .078  | .024  |
| 10                                 | -.083            | .048  | .087  | -.083        | .044  | .071  |
| 25                                 | -2.106           | 1.099 | .058  | -2.106       | 1.852 | .274  |
| 42                                 | -2.050           | .995  | .042  | -2.050       | 1.013 | .051  |
| 56                                 | .044             | .023  | .056  | .044         | .020  | .024  |
| R <sup>2</sup> =0.176<br>RMS=6.928 |                  |       |       |              |       |       |

Wrist velocity (degrees/s) - left flexion-extension

| Variable nr                        | Not bootstrapped |       |       | Bootstrapped |       |       |
|------------------------------------|------------------|-------|-------|--------------|-------|-------|
|                                    | B                | SE    | p-val | B            | SE    | p-val |
| 18                                 | -2.757           | 1.008 | .007  | -2.757       | .942  | .004  |
| 33                                 | -.474            | .238  | .049  | -.474        | .258  | .071  |
| 63                                 | 2.110            | .873  | .017  | 2.110        | .736  | .005  |
| 103                                | -3.230           | 1.083 | .004  | -3.230       | 1.050 | .007  |
| R <sup>2</sup> =0.214<br>RMS=5.177 |                  |       |       |              |       |       |

Wrist velocity (degrees/s) - left radial-ulnar deviation

| Variable nr                        | Not bootstrapped |       |       | Bootstrapped |                   |                   |
|------------------------------------|------------------|-------|-------|--------------|-------------------|-------------------|
|                                    | B                | SE    | p-val | B            | SE                | p-val             |
| 23                                 | 1.872            | .695  | .008  | 1.872        | .756 <sup>b</sup> | .017 <sup>b</sup> |
| 72                                 | -2.107           | 1.229 | .089  | -2.107       | .582 <sup>b</sup> | .002 <sup>b</sup> |
| R <sup>2</sup> =0.079<br>RMS=3.143 |                  |       |       |              |                   |                   |

Wrist velocity (degrees/s) - right flexion-extension

| Variable nr                        | Not bootstrapped |       |       | Bootstrapped |       |       |
|------------------------------------|------------------|-------|-------|--------------|-------|-------|
|                                    | B                | SE    | p-val | B            | SE    | p-val |
| 7                                  | .257             | .151  | .090  | .257         | .179  | .165  |
| 18                                 | -3.161           | 1.468 | .034  | -3.161       | 1.548 | .047  |
| 24                                 | -6.052           | 2.712 | .028  | -6.052       | 2.790 | .027  |
| 26                                 | 1.843            | 1.040 | .079  | 1.843        | 1.398 | .204  |
| 41                                 | -2.316           | .759  | .003  | -2.316       | .797  | .009  |
| 46                                 | 14.748           | 6.636 | .028  | 14.748       | 7.080 | .039  |
| 54                                 | .770             | .405  | .060  | .770         | .453  | .098  |
| 75                                 | -4.637           | 2.230 | .040  | -4.637       | 2.758 | .103  |
| 103                                | -3.863           | 1.517 | .012  | -3.863       | 1.467 | .014  |
| R <sup>2</sup> =0.317<br>RMS=7.138 |                  |       |       |              |       |       |

Wrist velocity (degrees/s) - right radial-ulnar deviation

| Variable nr                        | Not bootstrapped |       |       | Bootstrapped |       |       |
|------------------------------------|------------------|-------|-------|--------------|-------|-------|
|                                    | B                | SE    | p-val | B            | SE    | p-val |
| 2                                  | 2.647            | .795  | .001  | 2.647        | .858  | .003  |
| 31                                 | -.392            | .152  | .011  | -.392        | .163  | .022  |
| 36                                 | 2.908            | .763  | .000  | 2.908        | .807  | .001  |
| 43                                 | -2.274           | 1.080 | .038  | -2.274       | 1.243 | .052  |
| 47                                 | -15.366          | 3.504 | .000  | -15.366      | 4.744 | .005  |
| 48                                 | -17.183          | 4.629 | .000  | -17.183      | 5.287 | .003  |
| 57                                 | .899             | .332  | .008  | .899         | .348  | .012  |
| R <sup>2</sup> =0.341<br>RMS=3.754 |                  |       |       |              |       |       |

Wrist acceleration (degrees/s<sup>2</sup>) - left flexion-extension

| Variable nr                         | Not bootstrapped |        |       | Bootstrapped |        |       |
|-------------------------------------|------------------|--------|-------|--------------|--------|-------|
|                                     | B                | SE     | p-val | B            | SE     | p-val |
| 4                                   | -24.275          | 10.354 | .021  | -24.275      | 14.216 | .057  |
| 33                                  | -9.006           | 3.589  | .014  | -9.006       | 3.519  | .015  |
| 38                                  | -38.509          | 21.050 | .070  | -38.509      | 24.816 | .135  |
| 48                                  | -154.627         | 86.748 | .078  | -154.627     | 95.460 | .116  |
| 54                                  | 14.679           | 4.407  | .001  | 14.679       | 4.096  | .001  |
| 63                                  | 34.458           | 13.177 | .010  | 34.458       | 10.544 | .001  |
| 103                                 | -45.970          | 15.676 | .004  | -45.970      | 14.537 | .001  |
| R <sup>2</sup> =0.313<br>RMS=74.353 |                  |        |       |              |        |       |

Wrist acceleration (degrees/s<sup>2</sup>) - left radial-ulnar deviation

| Variable nr                         | Not bootstrapped |        |       | Bootstrapped |        |       |
|-------------------------------------|------------------|--------|-------|--------------|--------|-------|
|                                     | B                | SE     | p-val | B            | SE     | p-val |
| 9                                   | -.732            | .300   | .016  | -.732        | .232   | .005  |
| 4                                   | -11.190          | 5.202  | .034  | -11.190      | 5.187  | .023  |
| 23                                  | 18.558           | 8.399  | .029  | 18.558       | 7.930  | .015  |
| 46                                  | 88.361           | 33.321 | .009  | 88.361       | 35.560 | .014  |
| 54                                  | 5.516            | 2.154  | .012  | 5.516        | 2.556  | .033  |
| 72                                  | -27.183          | 15.107 | .075  | -27.183      | 8.909  | .007  |
| R <sup>2</sup> =0.229<br>RMS=37.804 |                  |        |       |              |        |       |

Wrist acceleration (degrees/s<sup>2</sup>) - light flexion-extension

| Variable nr                          | Not bootstrapped |         |       | Bootstrapped |         |       |
|--------------------------------------|------------------|---------|-------|--------------|---------|-------|
|                                      | B                | SE      | p-val | B            | SE      | p-val |
| 2                                    | -41.253          | 23.715  | .085  | -41.253      | 25.032  | .113  |
| 18                                   | -48.509          | 23.159  | .039  | -48.509      | 24.444  | .050  |
| 24                                   | -91.122          | 41.194  | .029  | -91.122      | 42.638  | .018  |
| 41                                   | -38.598          | 11.734  | .001  | -38.598      | 12.935  | .010  |
| 48                                   | -335.196         | 127.082 | .010  | -335.196     | 139.714 | .021  |
| 54                                   | 18.628           | 6.235   | .003  | 18.628       | 6.730   | .004  |
| 100                                  | -15.560          | 6.720   | .023  | -15.560      | 6.499   | .016  |
| 101                                  | 57.970           | 25.795  | .027  | 57.970       | 27.871  | .048  |
| 103                                  | -75.400          | 23.258  | .002  | -75.400      | 21.006  | .001  |
| R <sup>2</sup> =0.379<br>RMS=111.033 |                  |         |       |              |         |       |

Wrist acceleration (degrees/s<sup>2</sup>) - right radial-ulnar deviation

| Variable nr                         | Not bootstrapped |        |       | Bootstrapped |        |       |
|-------------------------------------|------------------|--------|-------|--------------|--------|-------|
|                                     | B                | SE     | p-val | B            | SE     | p-val |
| 3                                   | -27.906          | 15.867 | .081  | -27.906      | 11.021 | .012  |
| 19                                  | 22.413           | 8.107  | .007  | 22.413       | 7.538  | .006  |
| 47                                  | -277.478         | 51.780 | .000  | -277.478     | 67.006 | .001  |
| 48                                  | -311.209         | 68.454 | .000  | -311.209     | 74.633 | .001  |
| 57                                  | 12.284           | 5.015  | .016  | 12.284       | 5.467  | .027  |
| 65                                  | 14.489           | 5.953  | .017  | 14.489       | 7.242  | .050  |
| R <sup>2</sup> =0.351<br>RMS=56.029 |                  |        |       |              |        |       |

Force (%MVF) - keyboard

| Variable nr                        | Not bootstrapped |      |       | Bootstrapped |      |       |
|------------------------------------|------------------|------|-------|--------------|------|-------|
|                                    | B                | SE   | p-val | B            | SE   | p-val |
| 10                                 | -.015            | .008 | .072  | -.015        | .010 | .224  |
| 67                                 | -.360            | .190 | .060  | -.360        | .169 | .135  |
| R <sup>2</sup> =0.053<br>RMS=1.208 |                  |      |       |              |      |       |

Force (%MVF) - mouse

| Variable nr                        | Not bootstrapped |      |       | Bootstrapped |      |       |
|------------------------------------|------------------|------|-------|--------------|------|-------|
|                                    | B                | SE   | p-val | B            | SE   | p-val |
| 10                                 | -.009            | .003 | .012  | -.009        | .004 | .025  |
| 35                                 | -.203            | .099 | .043  | -.203        | .092 | .047  |
| 46                                 | -1.103           | .604 | .071  | -1.103       | .634 | .110  |
| 47                                 | 1.315            | .569 | .023  | 1.315        | .567 | .023  |
| 57                                 | .082             | .043 | .059  | .082         | .046 | .105  |
| 64                                 | -.178            | .089 | .049  | -.178        | .096 | .097  |
| 104                                | .113             | .052 | .032  | .113         | .050 | .043  |
| R <sup>2</sup> =0.340<br>RMS=0.486 |                  |      |       |              |      |       |

## Part 3

Self-reported factors (S-rep), software-recorded computer usage patterns (SW-rec), and additional worksite measurements of anthropometrics and workstation set-up (AWM).

### *Individual factors*

- S-rep 1. Age (mean=40 years, standard deviation=11.6 years)
- S-rep 2. Gender (male=28%/female=72%)
- S-rep 3. Handedness (right=87%/left=13%)
- S-rep 4. Education level (none or primary only=2%/lower vocational only=0%/secondary or vocational only=4%/secondary=8%/higher education=86%)
- S-rep 5. Number of years working for current company (mean=8.5 years, standard deviation=8.4 years)
- S-rep 6. Number of years of daily computer use at work (shorter than 1 year=8%/1-2 years=11%/2-5 years=20%/5-10 years=20%/>10 years=41%)
- S-rep 7. Coping (*DeVries et al. 1995, 14 question scale, range 14-56, mean=35, standard deviation=5*)
- S-rep 8. Over-commitment (*Siegrist et al. 2004, 11 question scale, range 0-18, mean=7, standard deviation=3*)
- S-rep 9. Self-reported height (mean=175 cm, standard deviation=12.3 cm)
- AWM 10a. Measured weight (mean=73 kg, standard deviation=14.7)
- S-rep 10b. Self-reported weight (mean=71 kg, standard deviation=14.0)
- AWM 11a. Calculated body mass index, using measured weight (mean=24 kg/m<sup>2</sup>, standard deviation=7.4 kg/m<sup>2</sup>)
- S-rep 11b. Calculated body mass index, using self-reported weight (mean=24 kg/m<sup>2</sup>, standard deviation=8.0 kg/m<sup>2</sup>)
- AWM 12. Measured arm length, acromion to radiale (mean=56 cm, standard deviation=5.6 cm)
- AWM 13. Measured forearm length, radiale to stylium (mean=25 cm, standard deviation=2.1 cm)
- AWM 14. Measured hand length, distal wrist crease to dactylion (mean=19 cm, standard deviation=13.9 cm)
- AWM 15. Measured hand breadth, between metacarpale II and V (mean=7.7 cm, standard deviation=0.65 cm)
- AWM 16. Measured shoulder breadth, acromion to acromion (mean=37 cm, standard deviation=2.9 cm)

### *Job characteristics*

- S-rep 17. Job title (secretary=8%/other supporting employee=19%/other=73%)
- S-rep 18. Working on a temporary contract (yes=41%/no=59%)

- S-rep 19. Number of working days per week (mean=4 days, standard deviation=1 day)
- S-rep 20. Number of working hours in contract per week (mean=32 hours, standard deviation=8 hours)
- S-rep 21. Supervising people (yes=10%/no=90%)
- S-rep 22. Working with hands above shoulder height during work (often=10%/seldom or never=90%)
- S-rep 23. Lifting or carrying >5kg at work (often=2%/once in a while=14%/seldom or never=84%)
- S-rep 24. Firmly squeezing with hands at work (often=8%/seldom or never=92%)
- S-rep 25. Repetitive tasks at work excluding computer use (seldom or never=81%/once in a while=11%/often=8%)
- S-rep 26. Precision mouse work (hardly ever=76%/0-1 hours per day=17%/1-2 hours per day=4%/2-4 hours per day=3%/>4 hours/day=0%)
- S-rep 27. Frequency of using computer and telephone at the same time at work (never=55%/sometimes=38%/often=7%/always=0%)
- S-rep 28. Increase in daily computer use during past year (yes=32%/no=68%)

*Computer work behavior*

- S-rep 29. Use of more than one computer at the same time during computer work (no=79%/sometimes=13%/regularly=4%/often=4%)
- S-rep 30. Total computer use hours per day at work (hardly ever=0%/0-1 hours per day=0%/1-2 hours per day=0%/2-4 hours per day=9%/4-6 hours per day=37%/6-8 hours per day=53%/>8 hours per day=1%)
- S-rep 31. Total computer use hours per day while working at home (never=28%/hardly ever=7%/0-1 hours per day=9%/1-2 hours per day=11%/2-4 hours per day=7%/4-6 hours per day=18%/6-8 hours per day=15%/>8 hours per day=4%)
- S-rep 32. Mouse use hours per day at work (hardly ever=1%/0-1 hour per day=9%/1-2 hours per day=24%/2-4 hours per day=40%/4-6 hours per day=27%/6-8 hours per day=0%/>8 hours per day=0%)
- S-rep 33. Mouse use hours per day while working at home (never=28%/hardly ever=14%/0-1 hour per day=12%/1-2 hours per day=15%/2-4 hours per day=12%/4-6 hours per day=9%/6-8 hours per day=8%/>8 hours per day=1%)
- S-rep 34. Use of break and reminder software (yes=6%/no=94%)
- S-rep 35. Performs stretch exercises during computer work (never=69%/sometimes, often, or always=31%)
- S-rep 36. Often works for >1 hour without 5 min break (yes=62%/no=38%)
- S-rep 37. Frequency of short (<5 min) breaks during computer use (hardly ever=17%/once in a while=18%/sometimes=31%/regularly=34%)
- S-rep 38. Forward chin movement while looking at the monitor (yes=86%/no=14%)
- S-rep 39. Supports elbow, wrist, or forearm during keyboard use (yes=90%/no=10%)



- S-rep 40. Supports elbow, wrist, or forearm during mouse use (yes=96%/no=4%)
- S-rep 41. Able to touch type (yes=37%/no, look at keyboard=13%/no, look at screen and keyboard=50%)
- S-rep 42. Number of fingers used for typing (1-2=16%/3-9=47%/10=37%)
- S-rep 43. Mouse handedness (right=89%/left=3%/both=8%)
- S-rep 44. Mouse motor control strategy (hand only=46%/lower arm only=22%/hand and arm=31%/no movement required=1%)
- S-rep 45. Sitting posture (a little bent forward=32%/straight up with back on chair=29%/straight up without back on chair=14%/bent back=6%/variable=19%)
- SW-rec 46. Measured percentage keyboard use (mean=22%, standard deviation=11%)
- SW-rec 47. Measured percentage mouse use (mean=42%, standard deviation=11%)
- SW-rec 48. Measured percentage idle time (mean=37%, standard deviation=9%)

*Psychosocial factors*

- S-rep 49. Number of overtime hours per week (mean=4.4 hours per week, standard deviation=6.5 hours per week)
- S-rep 50. Work continuation during formal breaks (yes=49%/no=51%)
- S-rep 51. Task variation (5 question scale, range 0-12, mean=8, standard deviation=2)
- S-rep 52. Effort (Siegrist et al. 2004, 5 question scale, range 0-20, mean=6, standard deviation=3)
- S-rep 53. Reward (Siegrist 2004, 11 question scale, range 0-20, mean=8, standard deviation=2)
- S-rep 54. Decision authority (Karasek 1998, 3 question scale, range 0-9, mean=7, standard deviation=2)
- S-rep 55. Perceived stress (Cohen et al. 1983, 4 question scale, range 0-12, mean=5, standard deviation=2)
- S-rep 56. Need for recovery (Veldhoven and Broersen 2003, Sluiter et al. 1999, 12 question scale, range 0-12, mean=4, standard deviation=3)
- S-rep 57. Number of deadlines in past 3 months (0=16%/1=14%/1-3=36%/>3=34%)
- S-rep 58. Current job satisfaction (never=2%/sometimes=10%/often=63%/always=25%)
- S-rep 59. Job satisfaction over the past 3 months (never=1%/sometimes=19%/often=64%/always=16%)
- S-rep 60. Increased time pressure in the last 3 months (no=50%/yes for a short time=11%/yes for a longer time=39%)
- S-rep 61. Burdened by increased time pressure in the last 3 months (no=56%/moderately=27%/rather=16%/very=1%)
- S-rep 62. Experience of stress at work (not=16%/a little=74%/quite=9%/very=0%)
- S-rep 63. Burdened by experience of stress at work (not=83%/a little=13%/quite=2%/very=2%)

- S-rep 64. Today's stress compared to normal stress (less=43%/normal=55%/more=2%)
- S-rep 65. Perceived tension (never=15%/sometimes=55%/few times per week=16%/>1 time per day=14%)

*Workstation set-up*

- S-rep 66. Use of laptop for office computer work (no=88%/<desktop use=7%/equal to desktop use=2%/>desktop use=1%/always=2%)
- S-rep 67. Lack of space on desk for proper mouse use (never=60%/sometimes=35%/often=5%/always=0%)
- S-rep 68. Mouse functioning (never=76%/sometimes, often, or always=24%)
- S-rep 69. Monitor location relative to keyboard (in front=92%/left or right=8%)
- S-rep 70. Monitor height relative to eyes (eye level or lower=88%/higher=12%)
- S-rep 71. Keyboard height relative to elbows (above=15%/level to=80%/other=5%)
- S-rep 72. Chair height (knees higher than hips=0%/knees level to hips=94%/cannot put feet on floor=6%)
- S-rep 73. Keyboard >10cm from table edge (yes=83%/no=17%)
- S-rep 74. Keyboard supports unfolded (yes=61%/no=39%)
- S-rep 75. Mechanical mouse with little ball underneath, instead of optical mouse (no=90%/yes=10%)
- S-rep 76. Mouse location relative to keyboard (right beside=24%/further away from=37%/next to and behind=22%/in front of and next to=17%/directly in front of=0%/another place=0%)
- AWM 77. Measured key activation force (mean=0.36 N, standard deviation=0.36 N)
- AWM 78. Measured key displacement (mean=3.1 cm, standard deviation=0.2 N)
- AWM 79. Measured knee height, footrest or floor to crease behind knees (mean=48 cm, standard deviation=3 cm)
- AWM 80. Measured chair height, footrest or floor to chair seat (mean=50 cm, standard deviation=3 cm)
- AWM 81. Measured monitor distance, monitor screen to nose (mean=67 cm, standard deviation=9 cm)
- AWM 82. Measured elbow height, footrest or floor to elbow (mean=75 cm, standard deviation=4 cm)
- AWM 83. Measured eye height, elbow to eye (mean= cm, standard deviation= cm)
- AWM 84. Measured keyboard height, footrest or floor to keyboard (mean=77 cm, standard deviation=3 cm)
- AWM 85. Measured keyboard distance, edge of table to keyboard (mean=24 cm, standard deviation=9 cm)
- AWM 86. Measured mouse height, footrest or floor to mouse (mean=83 cm, standard deviation=65 cm)
- AWM 87. Measured mouse distance, participant midline to mouse (mean=43 cm, standard deviation=7 cm)
- AWM 88. Measured mouse direction, angle from participant midline to mouse (mean=53 cm, standard deviation=11 cm)

- AWM 89. Measured monitor height, footrest or floor to monitor (mean=121 cm, standard deviation=10 cm)
- AWM 90. Measured seat depth, front edge of chair to backrest (mean=46 cm, standard deviation=3 cm)
- AWM 91. Measured monitor screen diagonal length (mean=47 cm, standard deviation=5 cm)
- AWM 92. Measured keyboard tilt angle (mean=7 degrees, standard deviation=4 degrees)

*Leisure-time activities*

- S-rep 93. Number of days per week with at least 30 minutes moderate physical activity (mean=4 days, standard deviation=2 days)
- S-rep 94. Time in past 3 months performing strenuous physical activity (never=13%/<1 per month=12%/1-3 times per month=13%/1 per week=18%/2 per week=22%/3+ times per week=22%)
- S-rep 95. Strength training of upper body in last 3 months (yes=25%/no=75%)
- S-rep 96. Playing sports involving upper extremities (e.g. racket sports, volleyball) in last 3 months (yes=15%/no=85%)
- S-rep 97. Hand intensive activities during leisure time in last 3 months (yes=27%/no=73%)
- S-rep 98. Duration of computer use during leisure time in last 3 months (almost never=0%/0 to 1 hours per day=9%/1 to 2 hours per day=43%/2 to 4 hours per day=34%/4 to 6 hours per day=12%/6 to 8 hours per day=2%/>8 hours per day=0%)
